# Supplementary material
Source: Research Square preprint supplement (doi:10.21203/rs.3.rs-9033071/v1)
Supplement: Supplementary file 1 [file 2fca0b4cd6118b240a3ac807.docx]

**Article title: Measuring and Characterizing Psychiatric Multimorbidity Among Individuals with Mental Illness**

Journal: Community Mental Health Journal

Authors: Removed for double-anonymous peer review.

Corresponding author: Removed for double-anonymous peer review.

**Online Resource 2** Analytic Sample

**71,443** person-year observations (29,768 unique ids) excluded

**23,729** errors in age

**6,039** errors in sex/gender

**865,495** person-year observations (365,613 unique ids) excluded

**295,716** Not a Massachusetts resident for full period

**501,923** Did not have primary insurance coverage type, or was listed as other

**67,856** Did not have insurance coverage for 7 months or more at the time of encounter

**2,409,794** person-year observations in the final analytic sample (999,091 Unique IDs)

**3,275,289** person-year observations without potential errors in data entry (1364704 unique IDs)

**3,346,732** person-year observations of people aged 21-64 with any psychiatric disorder between 2016-2018 (1,394,472 unique IDs)
