# Supplementary material
Source: Research Square preprint supplement (doi:10.21203/rs.3.rs-9033071/v1)
Supplement: Supplementary file 2 [file d69219e8794d3f4deac452e8.docx]

**Article title: Measuring and Characterizing Psychiatric Multimorbidity Among Individuals with Mental Illness**

Journal: Community Mental Health Journal

Authors: Removed for double-anonymous peer review.

Corresponding author: Removed for double-anonymous peer review.

| **Table 1** ICD-10 Codes Included in HEDIS Measure | |
| --- | --- |
| **ICD-10 Diagnostic Category*** | **ICD-10 Codes Included in HEDIS Mental Health Metric** |
| Unspecified Dementia (with and without disturbance) | F03.90, F03.91 |
| F20-F29: Schizophrenia, schizotypal, delusional, and other non-mood psychotic disorders | F20.0, F20.1, F20.2, F20.3, F20.5, F20.81, F20.89, F20.9, F21, F22, F23, F24, F25.0, F25.1, F25.8, F25.9, F28, F29 |
| F30-F39: Mood [affective] disorders | F30.10, F30.11, F30.12 F30.13, F30.2, F30.3, F30.4, F30.8, F30.9, F31.0, F31.10, F31.11, F31.12, F31.13, F31.2, F31.30, F31.31, F31.32, F31.4, F31.5, F31.60, F31.61, F31.62, F31.63, F31.64, F31.70, F31.71, F31.72 F31.73, F31.74, F31.75, F31.76, F31.77, F31.78, F31.81, F31.89, F31.9, F32.0, F32.1, F32.2, F32.3, F32.4, F32.5, F32.8, F32.81, F32.89, F32.9, F33.0, F33.1, F33.2, F33.3, F33.40 F33.41, F33.42, F33.8, F33.9, F34.0 F34.1, F34.8, F34.81, F34.89, F34.9, F39 |
| F40-F48: Anxiety, dissociative, stress-related, somatoform and other nonpsychotic disorders | F40.00, F40.01 F40.02, F40.10, F40.11, F40.210, F40.218, F40.220, F40.228, F40.230, F40.231, F40.232, F40.233, F40.240, F40.241, F40.242, F40.243, F40.248, F40.290, F40.291, F40.298, F40.8, F40.9, F41.0, F41.1, F41.3, F41.8, F41.9, F42, F42.2– F42.4, F42.8, F42.9, F43.0, F43.10, F43.11, F43.12, F43.20, F43.21, F43.22, F43.23, F43.24, F43.25, F43.29, F43.8, F43.9, F44.0, F44.1, F44.2, F44.4, F44.5, F44.6, F44.7, F44.81, F44.89, F44.9, F45.0, F45.1, F45.20, F45.21, F45.22, F45.29, F45.41, F45.42, F45.8, F45.9, F48.1, F48.2, F48.8, F48.9 |
| F50-F59: Eating disorders, sleep disorders not due to a substance or known physiological condition, Mental and behavioral disorders associated with the puerperium, not elsewhere classified, Unspecified behavioral syndromes associated with physiological disturbances and physical factors | F50.0, F50.10, F50.02, F50.2, F50.81, F50.82, F50.89, F50.9, F51.01 F51.02, F51.03, F51.04, F51.05, F51.09, F51.11, F51.12, F51.13, F51.19, F51.3, F51.4, F51.5, F51.8, F51.9, F52.0, F52.1, F52.21, F52.22, F52.31, F52.32, F52.4, F52.5, F52.6, F52.8, F52.9, F53, F59 |
| F60-F69: Disorders of adult personality and behavior | F60.0, F60.1, F60.2, F60.3, F60.4, F60.5, F60.6, F60.7, F60.81, F60.89, F60.9 F63.0, F63.1, F63.2, F63.3, F63.81, F63.89, F63.9, F64.0, F64.1, F64.2, F64.8, F64.9, F65.0, F65.1, F65.2, F65.3, F65.4, F65.50, F65.51, F65.52, F65.89, F65.9, F66, F68.10– 68.13, F68.8, F69 |
| F70-F79: Intellectual disabilities | EXCLUDED in HEDIS |
| F80-F89: Pervasive and specific developmental disorders (specific developmental disorders of speech and language, Specific developmental disorders of scholastic skills, Specific developmental disorder of motor function, Pervasive developmental disorders, other disorders of psychological development, Unspecified disorder of psychological development) | F80.0, F80.1, F80.2, F80.4, F80.81, F80.82, F80.89, F80.9, F81.0, F81.2, F81.81, F81.89, F81.9, F82, F84.0-F84.3, F84.5, F84.8, F84.9, F88, F89 |
| F90-F98: Behavioral and emotional disorders with onset usually occurring in childhood and adolescence | F90.0, F90.1, F90.2, F90.8, F90.9, F94.0, F94.1, F94.2, F94.8, F94.9, F95.0, F95.1, F95.2, F95.8, F95.9, F98.0, F98.1, F98.21, F98.29, F98.3, F98.4, F98.5, F98.8, F98.9 |
| F99: Unspecified mental disorders | F99 |
| *(1) F10-F19 are not part of HEDIS measure, and not included in this CHIA data extract due to privacy restrictions. All diagnosis codes for claims with a primary or secondary diagnosis of SUD have been redacted from the version of the MA APCD; (2) the following three categories were excluded from analysis based on HEDIS standards: (a) F01-F09: Mental disorders due to known physiological conditions and (b) Behavioral syndromes associated with physiological disturbances and physical factors | |
